# Supplementary material
Source: PubMed Central journal article supplement (PMC1805794)
Supplement: tjp0571-0555-Appendix.pdf [file tjp0571-0555-Appendix.pdf]

## APPENDIX 1

Following Schreiber et al (2003), we created the reliability statistic as follows.

Let  $\{x_i\}$  and  $\{y_j\}$  be the spike times from two trials with  $n$  and  $m$  spikes respectively. We can turn the  $\{x_i\}$  into a continuous function by allowing each spike time to be a Dirac delta function about  $x_i$ . Thus

$$(1) \quad \{x_i\} \rightarrow \sum_{i=1}^n \delta(t - x_i)$$

By convolving with a normalized Gaussian of width  $\sigma$ , we turn the discrete spike times into a well behaved, smooth curve.

$$\mathbf{x}(t) = \int_{-\infty}^{\infty} \sum_{i=1}^n \delta(\tau - x_i) \frac{1}{\sqrt{2\pi}\sigma} e^{-\frac{(t-\tau)^2}{2\sigma^2}} d\tau$$

$$(2) \quad \mathbf{x}(t) = \frac{1}{\sqrt{2\pi}\sigma} \sum_{i=1}^n e^{-\frac{(t-x_i)^2}{2\sigma^2}}$$

Similarly

$$(3) \quad \mathbf{y}(t) = \frac{1}{\sqrt{2\pi}\sigma} \sum_{j=1}^m e^{-\frac{(t-y_j)^2}{2\sigma^2}}$$

Schreiber et al (2003) defines the reliability between two spike trains as the normalized dot product of these functions.

$$(4) \quad R_{xy} = \frac{\mathbf{x} \cdot \mathbf{y}}{|\mathbf{x}| |\mathbf{y}|}$$

However, whereas Schreiber et al (2003) advocates treating  $x$  and  $y$  as vectors, and calculating the dot product point by point over an arbitrary  $\Delta t$ , we chose to keep them as continuous functions.

$$(5) \quad \begin{aligned} \mathbf{x} \cdot \mathbf{y} &= \int_{-\infty}^{\infty} \mathbf{x}(t) \mathbf{y}(t) dt \\ &= \int_{-\infty}^{\infty} \left( \sum_{i=1}^n \frac{1}{\sqrt{2\pi}\sigma} e^{-\frac{(t-x_i)^2}{2\sigma^2}} \right) \left( \sum_{j=1}^m \frac{1}{\sqrt{2\pi}\sigma} e^{-\frac{(t-y_j)^2}{2\sigma^2}} \right) dt \end{aligned}$$

$$(6) \quad \mathbf{x} \cdot \mathbf{y} = \frac{1}{2\pi\sigma^2} \sum_{i=1}^n \sum_{j=1}^m \int_{-\infty}^{\infty} e^{-\frac{(t-x_i)^2}{2\sigma^2} - \frac{(t-y_j)^2}{2\sigma^2}} dt$$

Manipulating the numerator of the exponent in (6) by expanding the terms and completing the square yields:

$$\mathbf{x} \cdot \mathbf{y} = \frac{1}{2\pi\sigma^2} \sum_{i=1}^n \sum_{j=1}^m \int_{-\infty}^{\infty} e^{-\frac{(x_i-y_j)^2}{4\sigma^2}} e^{-\frac{(t-\frac{x_i+y_j}{2})^2}{\sigma^2}} dt$$

$$(7) \quad \mathbf{x} \cdot \mathbf{y} = \frac{1}{2\sqrt{\pi}\sigma} \sum_{i=1}^n \sum_{j=1}^m e^{-\frac{(x_i-y_j)^2}{4\sigma^2}}$$

We can now write down the norms by defining  $|\mathbf{x}| = \sqrt{\mathbf{x} \cdot \mathbf{x}}$  and  $|\mathbf{y}| = \sqrt{\mathbf{y} \cdot \mathbf{y}}$ .

$$(8) \quad | \mathbf{x} | = \sqrt{\mathbf{x} \cdot \mathbf{x}} = \sqrt{\left( \sum_{i=1}^n \sum_{j=1}^n e^{-\frac{(x_i - x_j)^2}{4\sigma^2}} \right)}$$

$$(9) \quad | \mathbf{y} | = \sqrt{\mathbf{y} \cdot \mathbf{y}} = \sqrt{\left( \sum_{i=1}^m \sum_{j=1}^m e^{-\frac{(y_i - y_j)^2}{4\sigma^2}} \right)}$$

Finally, we can insert (7-9) into (4) and explicitly write the reliability in terms of spike times and  $\sigma$ .

$$(10) \quad R_{xy} = \frac{\sum_{i=1}^n \sum_{j=1}^m e^{-\frac{(x_i - y_j)^2}{4\sigma^2}}}{\sqrt{\left( \sum_{i=1}^n \sum_{j=1}^n e^{-\frac{(x_i - x_j)^2}{4\sigma^2}} \right) \left( \sum_{i=1}^m \sum_{j=1}^m e^{-\frac{(y_i - y_j)^2}{4\sigma^2}} \right)}}$$

Although the expression appears bulky, it significantly speeds computation time when compared with treating  $x$  and  $y$  as vectors. Reliability across  $N$  trials can be found by averaging the pairwise reliabilities:

$$(11) \quad \mathbf{R} = \frac{2}{N(N-1)} \sum_{i=1}^{N-1} \sum_{j=i+1}^N R_{ij}$$
