# Supplementary material
Source: PubMed Central journal article supplement (PMC1805794)

Figure S1.

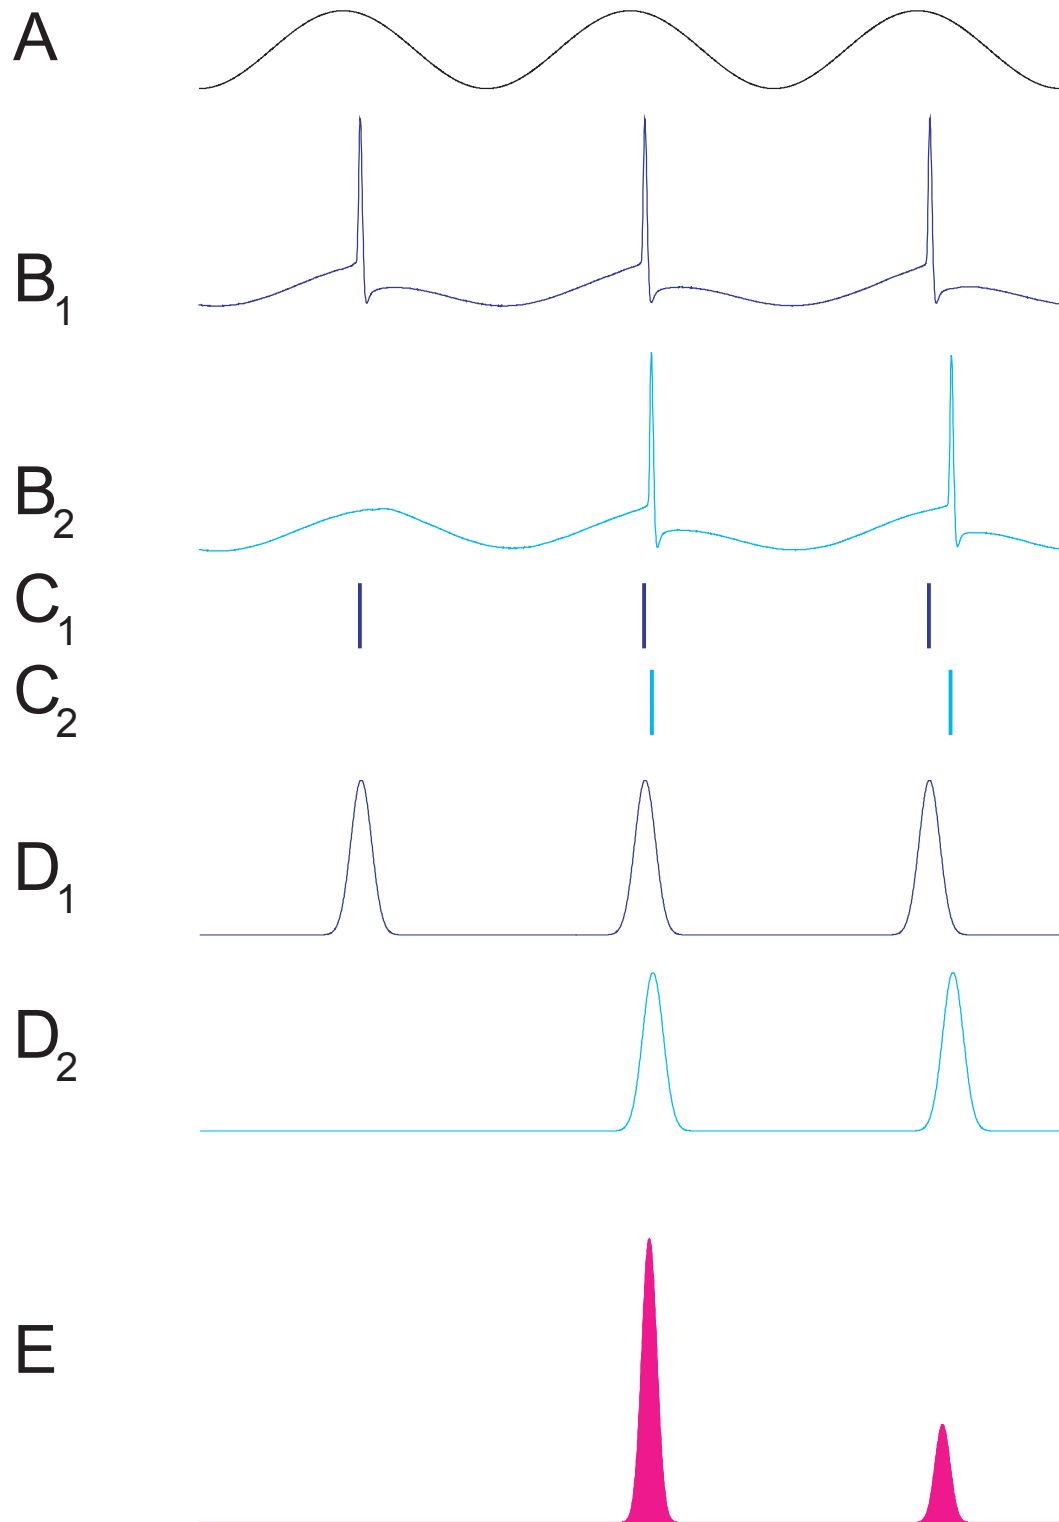

Supplement: tjp0571-0555-Figure-S1.pdf [file tjp0571-0555-Figure-S1.pdf]
